# Vertical transmission of sponge microbiota is weak and inconsistent

Johannes R. Björk<sup>1,3†</sup>, Carmen Astudillo-García<sup>2</sup>, Elizabeth Archie<sup>1\*</sup>, and Jose M. Montoya<sup>3\*</sup>

<sup>1</sup>Department of Biological Sciences, University of Notre Dame, United States

<sup>2</sup>School of Biological Sciences, University of Auckland, New Zealand

<sup>3</sup>Theoretical and Experimental Ecology Station, CNRS-University Paul Sabatier, Moulis, France

<sup>†</sup>Corresponding author

<sup>\*</sup>Joint senior authorship

<sup>1,3†</sup>[rjbork@nd.edu](mailto:rjbork@nd.edu)

<sup>2</sup>[c.astudillo@auckland.ac.nz](mailto:c.astudillo@auckland.ac.nz)

<sup>1\*</sup>[earchie@nd.edu](mailto:earchie@nd.edu)

<sup>3\*</sup>[Josemaria.montoyateran@sete.cnrs.fr](mailto:Josemaria.montoyateran@sete.cnrs.fr)

## Abstract

Classic evolutionary theory predicts that if beneficial microbial symbionts improve host fitness, they should be faithfully transmitted to offspring. More recently, the hologenome theory of evolution predicts resemblance between parent and offspring microbiomes, and high partner fidelity between host species and their vertically transmitted microbes. Here, we test these ideas for the first time in multiple host species with highly diverse microbiota, leveraging known-parent offspring pairs sampled from eight species of wild marine sponges (Porifera). Contrary to the hypothesis that vertical transmission is an adaptation that allows sponges to faithfully transmit intact microbial consortia to offspring, we found that vertical transmission is weak and incomplete. Further, we found no evidence that siblings consistently receive the same microbes from their parents, nor that vertically transmitted microbes show high degrees of host species fidelity. Finally, while we show that monophyletic groups of microbes with known symbiotic features and capabilities are more common among vertically transmitted microbes than in the consortia of horizontally acquired microbes, the signature of this vertical transmission is only detectable on the level of Porifera as a whole.

24 Our study demonstrates that common predictions of vertical transmission that stem from species-poor systems are  
25 not necessarily true when scaling up to diverse and complex microbiomes.

## 26 Introduction

27 All animals are colonized by microbes. These microbes live in communities, called microbiomes, that often exhibit  
28 astonishing diversity and complexity and can have profound effects on host health and fitness [1, 2, 3]. However,  
29 despite their importance, we still do not understand how most organisms acquire their microbiomes: are they largely  
30 inherited from parents via vertical transmission or acquired horizontally from the environment? In the last five years,  
31 the literature has provided widely divergent answers to this question [4, 5, 6]. Yet understanding the degree to which  
32 vertical versus horizontal transmission dominate microbiome assembly across the animal tree of life is necessary to  
33 learn how environments shape host phenotypes via host-microbe interactions and whether natural selection can act on  
34 hosts and their microbiomes as a unit (i.e., the hologenome theory of evolution) [7, 8, 9, 10, 11].

35 Classic evolutionary theory predicts that if microbial symbionts are beneficial, they should be vertically trans-  
36 mitted. Moreover, the more an animal host depends on its microbial partners, the higher the expected incidence of  
37 vertical transmission [12, 13, 14]. If microbes provide services that animals depend on, and if successful parents  
38 have well-functioning symbioses with microbes that lead to increase performance and fitness, then parents should be  
39 selected to ensure faithful transmission of these symbionts to offspring. In support, strict vertical transmission through  
40 the germline occurs in many well-known symbiotic systems, including *Buchnera*-aphid, *Rhizobia*-legume, and *Wol-*  
41 *bachia*-arthropod [15]. A recent comparative study even found that the removal of vertically transmitted microbial  
42 symbionts resulted in a larger reduction of host fitness compared to the removal of horizontally transmitted symbionts  
43 [5]. However, despite this well-developed theory, evidence for horizontal transmission is increasingly common—at  
44 least in hosts with relatively simple microbiota [6, 16, 17, 18]. Two examples include the bioluminescent *Vibrio*-squid  
45 symbiosis [19], and the symbiosis between chemolithoautotrophic bacteria and the hydrothermal vent tubeworm *Riftia*  
46 *pachyptila* [20]. Recently, Mushegian and colleagues demonstrated that, in water fleas (*Daphnia magna*), microbes  
47 that are essential to host functioning are acquired from the environment and not maternally derived [21]. In gen-  
48 eral, caution should be taken when extrapolating patterns and processes from species-poor systems to highly diverse  
49 microbiomes: with increasing community complexity, do parents transmit a representative sample of the whole micro-  
50 bial community or select only a critical set of the most beneficial microbes? How does vertical transmission interact  
51 with other community assembly processes shown to be important in complex communities, including ecological drift,

52 priority effects, and environmental selection?

53 Studies that test vertical transmission in host species with diverse microbiota are needed to resolve these ques-  
54 tions. The present study is, to our knowledge, the first in-depth analysis of the strength and consistency of vertical  
55 transmission in multiple host species from an animal phylum with diverse and complex microbiomes. Moreover, by  
56 characterizing signatures of vertical transmission in multiple, related host species, we also test, for the first time, part-  
57 ner fidelity between vertically transmitted microbes and their hosts. Partner fidelity is predicted by the hologenome  
58 theory of evolution because if vertically transmitted microbes occur in multiple host species, this weakens the coher-  
59 ence of the unit of selection [10]. Here we test these ideas in marine sponges, an evolutionary ancient phylum with  
60 a fossil record dating back over 600 million years [22]. Indeed, Porifera are the oldest metazoan group with known  
61 microbial symbioses [23]. Marine sponges are filter-feeders with a simple body plan consisting of canals embedded  
62 in an extracellular matrix called the mesohyl. Within the mesohyl, sponges maintain diverse microbial communities  
63 that contribute to host functioning by cycling nitrogen, fixing carbon dioxide, producing secondary metabolites, and  
64 acquiring and converting dissolved organic matter—tasks that, in many cases, the sponge cannot perform without  
65 microbial symbionts [23, 24, 25].

66 While the prevailing transmission model in marine sponges include both horizontal and vertical transmission [26],  
67 at least three lines of evidence suggest that vertical transmission plays an important role in the assembly of sponge  
68 microbiota. First, sponges appear to have coevolved with a unique set of microbial symbionts that form so-called  
69 *sponge-enriched* 16S rRNA gene sequence clusters [27, 28]. These *sponge-enriched clusters* span 14 known bacterial  
70 and archaeal phyla many of which are highly specific to the phylum Porifera (e.g., phyla such as Poribacteria, Chlo-  
71 roflexi and PAUC34f) [27, 28]. Unlike any other group of animal associated microbial symbionts described to date,  
72 each sponge-enriched cluster is monophyletic, indicating that microbes assigning to these clusters have diverged from  
73 their free-living relatives [27, 28]. Second, electron micrographs have revealed that sponge oocytes, embryos, and  
74 larvae contain free-swimming or vacuole-enclosed endosymbiotic bacteria that are morphologically identical to those  
75 found in the mesohyl of the parent [29, 30, 31, 32]. The mechanisms for microbial selection and transference to the  
76 oocytes vary between sponge species [32], as does the density and diversity of microbes that are incorporated into the  
77 oocytes [33, 34, 35]. Third, multiple studies, largely based on non-high-throughput sequencing methods, have found  
78 similar microbial phylotypes in adults and larvae from the same species [36, 37, 26, 38, 39]. One study also found  
79 that three pre-selected bacterial taxa that were present in the embryos of the tropical sponge *Corticium sp.* persisted  
80 throughout development and were consistently detected in adult samples over a period of three years [40]. These  
81 lines of evidence altogether strongly suggest that vertical transmission may be a frequent phenomenon that ensures the

82 assembly of a functioning and beneficial microbiota in many species of marine sponges.

83 Despite this compelling evidence for vertical transmission, no studies have yet used high-throughput sequencing  
84 to test for evidence of vertical transmission by comparing microbial sharing in known parent-offspring pairs from wild  
85 sponges. We fill this gap and test three broad hypotheses about the strength and consistency of vertical transmission  
86 in sponges that are generalizable to any host-microbe system. First, we test the hypothesis that vertical transmission  
87 is comprehensive, such that microbiomes in larval offspring are either a perfect replica of, or a subset of, the microbes  
88 found in their adult parents. Alternatively, vertical transmission might be incomplete or undetectable; if incomplete,  
89 larval offspring will share only a fraction of their microbes with their parent, but this proportion will be higher than the  
90 proportion of microbes they share with other adults of the same species. If vertical transmission is undetectable, then  
91 larval offspring will be just as likely to share microbes with other conspecific adults as they are with their parents. Sec-  
92 ond, we test the consistency of vertical transmission between parents and offspring. We hypothesize that if a specific  
93 set of symbionts have co-evolved with their sponge host, and if it is adaptive for parents to transmit this specific set  
94 of symbionts, then all offspring from the same parent should receive an identical or highly consistent set of beneficial  
95 symbionts. Alternatively, if consistent vertical transmission is not important to parental fitness, or if parents benefit  
96 from transmitting different symbionts to each offspring (e.g., if larvae settle in variable environments where only a  
97 subset of symbionts is beneficial), then we might expect larvae to receive a variable or even random subset of microbes  
98 from their parents that is inconsistent between siblings. Third, we test whether vertically transmitted taxa exhibit part-  
99 ner fidelity. If symbionts have coevolved with a particular sponge species, then conspecific sponge adults and larvae  
100 should share more vertically transmitted microbes with each other than with heterospecific individuals. Lastly, we  
101 test a hypothesis specific to marine sponges, that vertically transmitted microbes assign to *sponge-enriched clusters*  
102 more frequently than the consortia of horizontally acquired microbes. Overall, our results help to shed light on the  
103 prevalence and importance of vertical versus horizontal transmission in an animal phylum with diverse microbiota that  
104 has important ramifications for understanding co-evolution between hosts and their associated microbiota in general.

## 105 **Results and Discussion**

### 106 **Taxonomic diversity is distributed along a *sponge-specific axis***

107 To establish parent-offspring relationships for wild sponges, we placed mesh traps around adult sponges living close  
108 to the Islas Medas marine reserve in the Mediterranean Sea. We sampled 24 adults from a total of eight sponge species  
109 (Table [S1](#)) and collected 63 larval offspring from 21 of these adults (1 to 5 larvae sampled per adult; Table [S2](#)). To

110 characterize environmental microbes, we simultaneously collected seawater samples from seven locations within the  
111 sample area near where the adult sponges were found.

112 After quality control, we obtained 11,375,431 16S rRNA gene amplicon reads from these 94 samples (mean=121,015  
113 reads per sample; min=1116, max=668,100 reads), resulting in 12,894 microbial ASVs (Amplicon Sequence Variants).  
114 Of these, 9,030 ASVs were present in the 24 sponge adults, 5,786 were found in their 63 larval offspring, and 9,802  
115 ASVs occurred in the seven seawater samples. The 12,894 ASVs were classified to over 30 bacterial phyla and candi-  
116 date phyla, five of which were only detected in the surrounding seawater. One class of Proteobacteria was unique to  
117 the sponge adults, and two phyla, Deferribacteres and Fibrobacteres, were especially enriched in larval offspring albeit  
118 present in low abundances in the other two environments (Figure 1A). While several phyla (classes for Proteobacteria)  
119 were shared between all three environments (circles close to the center in Figure 1A), likely representing horizontally  
120 acquired ASVs, a large fraction of the observed taxonomic diversity was only shared between sponge adults and lar-  
121 vae, distributed along a *sponge-specific axis* (left-hand side of the ternary plot in Figure 1A). These included many  
122 common sponge-associated phyla, such as Poribacteria, Chloroflexi, and PAUC34f, but also more arcane phyla like  
123 Tectomicrobia and SBR1093 (Figure 1A). Many of the sponge-associated phyla include microbes with known symbi-  
124 otic features and functional capabilities. For example, members of Poribacteria and Chloroflexi harbor eukaryote-like  
125 protein domains which are suspected to be involved in preventing phagocytosis by the sponge host [41, 42]. Several  
126 genomic features in Chloroflexi are related to energy and carbon converting pathways, including amino and fatty acid  
127 metabolism and respiration, that directly benefit the sponge host [42]. Microbes from PAUC34f have the capacity to  
128 produce, transport and store polyphosphate granules, likely representing a phosphate reservoir for the sponge host in  
129 periods of deprivation [43]. This type of evidence strongly suggests that microbes from these phyla indeed represent  
130 beneficial symbionts for sponge hosts.

131 The ASVs we found also assigned to 105 different *sponge-enriched clusters* from 13 different bacterial phyla, of  
132 which Proteobacteria, Chloroflexi and Poribacteria represented the three most common (PAUC34f came in 5th place)  
133 (Figure 1B). These *sponge-enriched clusters* accounted for 9.6% of the total ASV richness and 25.5% of the total  
134 sequence count across samples. 94 *sponge-enriched clusters* were found in seawater, however, these only accounted  
135 for about 5% of the ASV richness and 0.23% of the total number of sequences in seawater. Out of these 94 *sponge-*  
136 *enriched clusters*, only 4 were not detected in the sponge hosts, supporting the idea that a rare biosphere functions  
137 as a seed bank for colonization of sponge hosts [44]. While very few *sponge-enriched clusters* occurred in all three  
138 environments (circles close to the center in Figure 1B), 62 were distributed along the sponge-specific axis (with a  
139 relative abundance of <0.01% in the seawater). Sponge larvae do not filter feed prior to settlement and metamorphosis

140 [45]. Concurrently, very little taxonomic diversity, just one phyla and two *sponge-enriched clusters*, was shared  
 141 between larvae and seawater only (bottom axis of the ternary plots in Figure 1B), showing that, at least at these higher  
 142 taxonomic levels, there is a signature of microbial dispersal and posterior enrichment between adults and larvae.

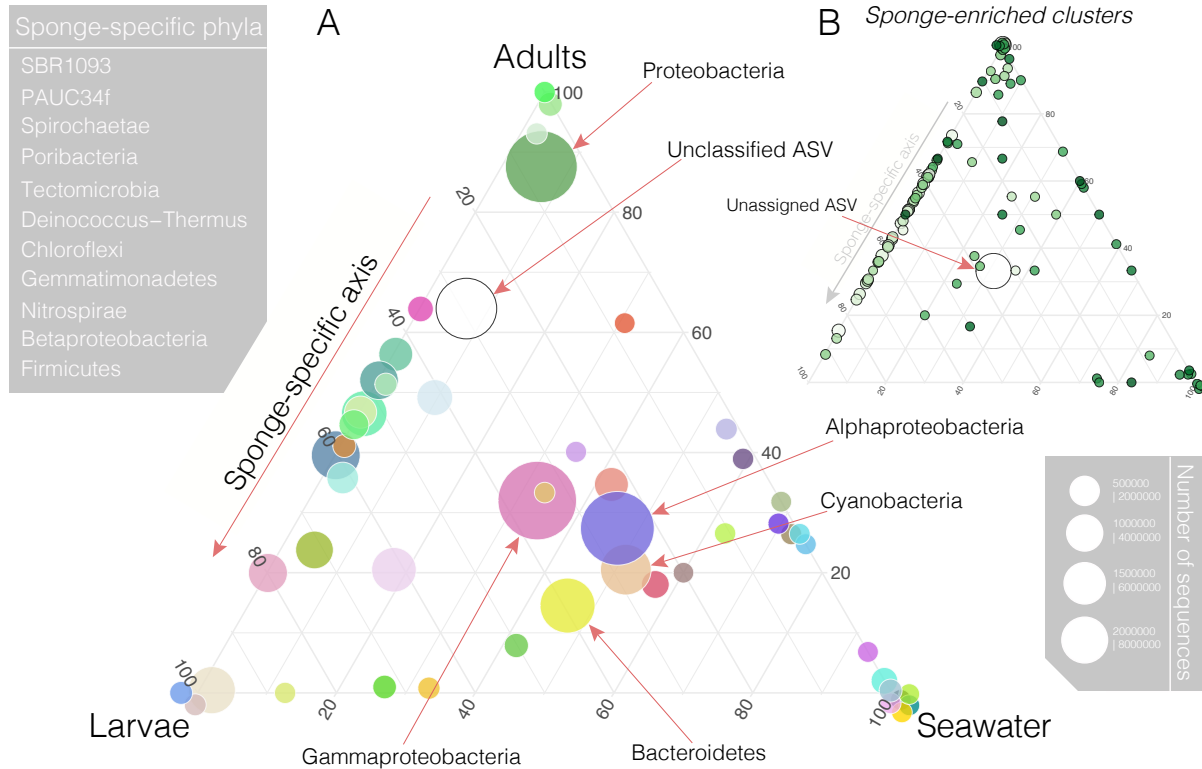

Figure 1: Ternary plots indicating the fraction of (A) all phyla, and (B) *sponge-enriched clusters* present in three environments: seawater (bottom right corner); sponge adults (top corner); and larval offspring (bottom left corner). Plot (A) shows the distribution of all microbial ASVs at the phylum level (class level for Proteobacteria). Plot (B) shows the diversity of all ASVs assigning to *sponge-enriched clusters*. ASVs that classify to phyla and *sponge-enriched clusters* that are unique to any of the three environments occur in their respective corners (100%); ASVs that classify to phyla and *sponge-enriched clusters* that are shared between any two environments occur along their focal axis. ASVs that classify to phyla and *sponge-enriched clusters* that are present in all three environments occur in the center of the ternary plots. Circle size corresponds the number of sequences that are classified to a given phylum or *sponge-enriched cluster*

### 143 Vertical transmission in sponges is detectable, but weak and incomplete

144 To help characterize patterns of vertical transmission, we built three bipartite networks that we hypothesized would  
 145 reflect increasing host-microbe specificity (Figure 2A-C): an *overall* network containing all ASVs detected in adults,  
 146 larvae, and the seawater (Figure 2A); a *sponge-specific* network containing ASVs harbored by adults and larvae, but

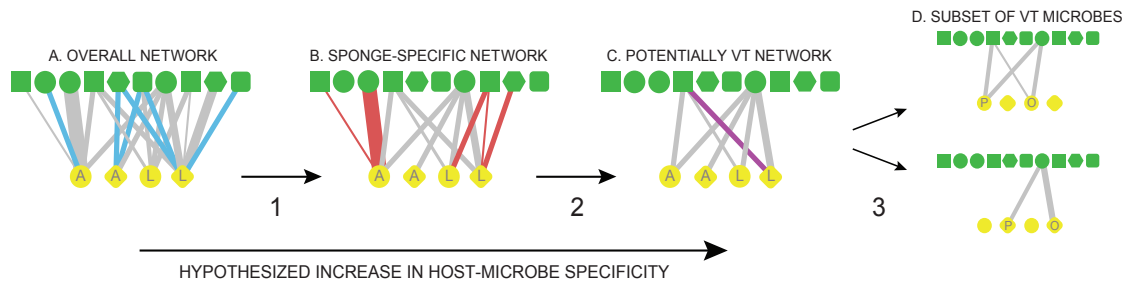

Figure 2: A conceptual diagram of the three different bipartite networks that we constructed (A through C) and an illustration of how we defined vertically transmitted microbes (networks under D). We hypothesize that these networks increase in host-microbe specificity as you move towards the right in the figure. Correspondingly, the microbial communities (i.e., the top level of each network) increased in community similarity with increasing host-microbe specificity (Figure S1). Sponges are in yellow and microbes in green; shapes represent different species; A=adult; L=larva; P=parent; O=offspring that are connected by edges that correspond to the relative abundance of microbes harbored by hosts. Network (A) corresponds to an *overall* network that contains all ASVs detected in adults, larvae, and the surrounding seawater. At arrow 1, we remove microbes present in the seawater (blue edges) to create network (B), which represents a *sponge-specific* network that contains ASVs only harbored by adults and larvae. At arrow 2, we remove microbes that are only present in adults or larvae, but not both (red edges) to create network (C), which corresponds to a *potentially vertically transmitted* network that contains ASVs found in at least one adult and one larva for a given sponge species. Note that these ASVs can still be present in multiple sponge species. At arrow 3, we subset the potentially vertically transmitted network to only include ASVs shared between a focal offspring and its parent (the purple edge is the only one that does not meet this criteria) to create subsets of vertically transmitted microbes. Note that vertically transmitted microbes can only be identified for one parent at a time. We analyzed these three networks (A-C) either as one network per sponge species, or one network containing all species.

147 not present (or below our detection limit) in the seawater (Figure 2B); and finally a *potentially vertically transmitted*  
148 network containing ASVs found in at least one adult and one larva for a given sponge species (Figure 2C; note that  
149 these ASVs can still be present in multiple sponge species). From the *potentially vertically transmitted* network, we  
150 further defined the subset of vertically transmitted ASVs as those shared between a focal offspring and its parent  
151 (Figure 2D).

152 We first tested whether vertical transmission in sponges was detectable, and if so, whether it was comprehensive or  
153 incomplete. A visual inspection of taxonomic profiles of the microbiota between parents and offspring indicated that  
154 offspring often harbor similar microbial phyla to their parents, as well as to non-parental conspecific adults (Figure 3).  
155 However, this similarity at the phylum level was superficial and largely disappeared when we re-focused our analyses  
156 to the level of individual ASVs. Specifically, while signatures of vertical transmission were detectable, they were very  
157 incomplete. For instance, across all sponge species, larvae shared, on average, only 1.43% of their *overall* ASVs with  
158 their adult parents (Figure S3). This percent of sharing was not different than the percent of ASVs larvae shared with  
159 conspecific adults living nearby (MD=0.081, 95% CI [-0.039,0.211]) Figure 4A), indicating that, at the level of all the  
160 microbes found in larvae, vertical transmission is essentially undetectable.

161 However, the analysis above included ASVs found in seawater, which may represent transient microbes passing  
162 through the host that are not consistent or important members of the sponge microbiota. Indeed, the detectability of  
163 vertical transmission increased as we partitioned the data into networks with increasing host-microbe specificity, but  
164 the proportion of vertically transmitted ASVs varied considerably both within and between species (Figure S3). By  
165 pooling samples across species, sacrificing resolution for statistical power, offspring shared a slightly higher propor-  
166 tion of vertically transmitted ASVs with their parents than with the non-parental conspecific adults in both the *sponge-*  
167 *specific* and *potentially vertically transmitted* network (*sponge-specific*: MD=0.326, 95% CI [0.014,0.626]; Figure 4B,  
168 *potentially vertically transmitted* network: MD=0.623, 95% CI [0.082,1.177]; Figure 4C). At the level of each indi-  
169 vidual host species, we only observed evidence for vertical transmission in two sponges: *O. lobularis* (*sponge-specific*:  
170 MD=0.80, 95% CI [-0.005,1.454]; *potentially vertically transmitted*: MD=1.27, 95% CI [0.12,2.33]; Figure S4a), and  
171 *C. crambe* (*sponge-specific*: MD=0.88, 95% CI [0.211,1.467]; *potentially vertically transmitted* network: MD=2.40,  
172 95% CI [0.522,4.503]; Figure S4B).

173 We also tested whether offspring shared a higher proportion of vertically transmitted *sponge-enriched clusters* with  
174 their parents than with non-parental conspecific adults. We found that, while the proportion of vertically transmitted  
175 clusters were somewhat higher for some adults compared to others (Figure S3), offspring did not share a higher propor-  
176 tion of vertically transmitted *sponge-enriched clusters* with their parents than they did with non-parental conspecific



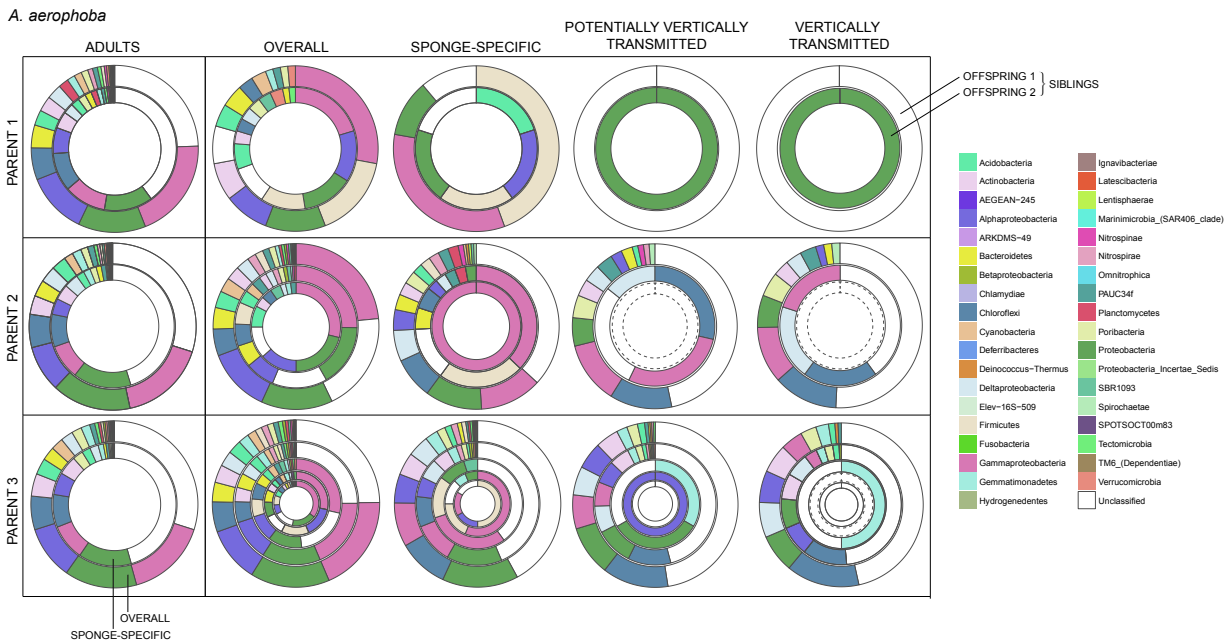

Figure 3: Donut charts showing the relative contribution of ASVs classifying to different microbial phyla (classes for Proteobacteria) in sponge parents and their offspring across the different networks in Figure 2. The left-hand column corresponds to the three adult specimens of *A. aerophoba*, while the remaining donuts depict microbial communities within their offspring across the different networks. For the adult donut charts, the inner and outer donuts represent the *overall* and *sponge-specific* networks, respectively. For the offspring donut charts, concentric donuts correspond to each offspring from the same parent (i.e. siblings). All donuts show results for the sponge species *A. aerophoba*; results for the other sponge species are in (Figure S2A-G). White donuts with a solid outline indicate a community where all the ASVs were unclassified. White donuts with a dashed outline indicate a community where the focal offspring did not contain any ASVs found in the focal network. Colors represent different microbial phyla (classes for Proteobacteria).

177 adults (MD=0.103, 95% CI [-0.08,0.304]; Figure 4a).

178 To further characterize patterns of vertical transmission, we computed modularity on weighted bipartite networks  
 179 constructed for each sponge species (DIRT\_LPA\_wb\_plus, [46]). In the ecological network literature, modules are  
 180 groups of species that “interact” more among themselves than with groups of other species (e.g., flowers and their  
 181 pollinators, and fruits and their seed dispersers). If modules are perfectly separated; that is, no species interact with  
 182 species from other modules, we call them compartments. Weighted modularity has been shown to be positively cor-  
 183 related with network specialization ( $H_2'$ ), reinforcing the idea that modules exist because some species do not interact  
 184 with each other [47]. Computing modularity on weighted networks allows for weighting species by information con-  
 185 tent (here, relative abundance), which means that rare microbes are down-weighted and modules are formed around the  
 186 most common host–microbe associations [47, 46]. The networks will be organized into compartments corresponding

187 to parents and offspring if they harbor the same set of microbes, and if those microbes are unique to those parents and  
 188 offspring. We tested whether the observed modules deviated from the prior expectation of perfectly separated parent-  
 189 offspring compartments using the Normalized Mutual Information (NMI) criterion [48, 49]. NMI ranges between  
 190 0 and 1, where 0 indicates complete dissimilarity between expected and observed modules, and 1 indicates that the  
 191 observed modules only contain nodes corresponding to parents and offspring. While the majority of networks were  
 192 highly modular (Table S3), the observed modules were not comprised of nodes corresponding to parents and offspring.  
 193 The *sponge-specific* networks had, on average, the highest NMI score (Figure S5A), but these networks were still quite  
 194 far from the prior expectation of perfectly separated parent-offspring compartments (Figure S5B).

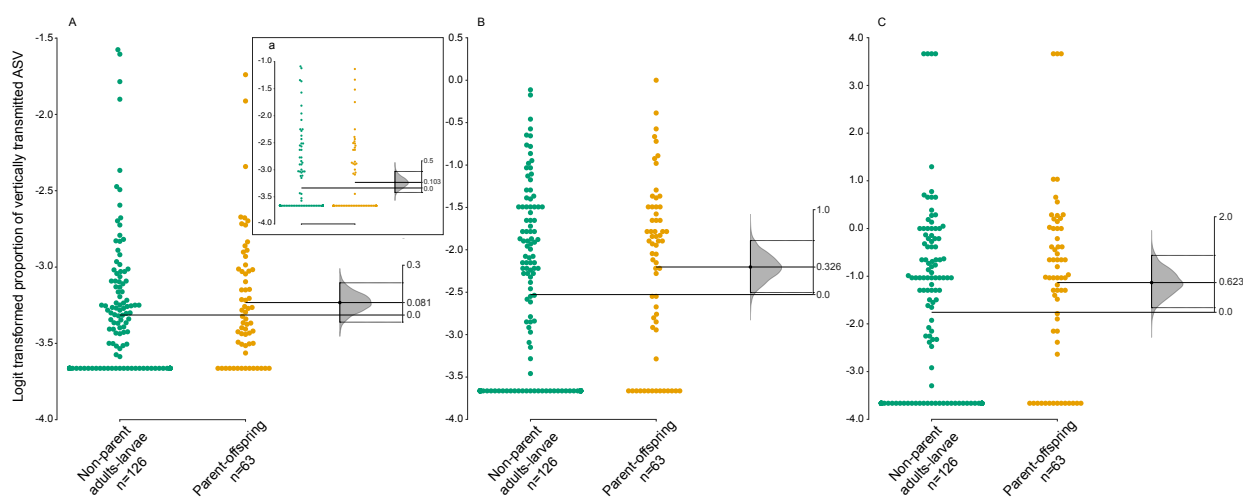

Figure 4: Gardner-Altman comparison plots of logit transformed proportions of vertically transmitted ASVs shared between sponge larvae and either (i) their known parents (orange dots), or (ii) two non-parental conspecific adults (green dots). Each plot contains comparisons for all host species (see Figure S3), and each dot represents one parent-offspring pair or one non-parent-offspring pair. Plot (A) corresponds to the *overall* network; plot (B) to the *sponge specific* network; and plot (C) to the *potentially vertically transmitted* network. Finally, subplot (a) corresponds to the *overall* network but for *sponge-enriched clusters* (the axes in this plot is the same as in A-C). Parents and offspring shared, on average, 1.5%, 10.6% and 31.3% of the ASVs present in the *overall*, *sponge-specific* and *potentially vertically transmitted* network, respectively. In comparison, non-parental conspecific adults and larvae shared, on average, 1.4%, 8.4% and 23% of the ASVs present in the same networks. Furthermore, parents and offspring, and non-parental conspecific adults and larvae, shared, on average, 0.019% and 0.015% of vertically transmitted *sponge-enriched clusters* present in the *overall* network, respectively. The axis on the right-hand side of the plots shows the mean difference distribution between the two groups, and the narrowness of the confidence interval gives a clear impression of effect size precision.

## 195 **Vertical transmission is inconsistent; each offspring receives a different set of microbes from** 196 **their parent**

197 The results above indicate that vertical transmission in sponge microbiomes is incomplete. One explanation for this  
198 lack of completeness is that perhaps only a few symbiotic microbes are required to establish a functioning and ben-  
199 efcial microbiota; hence, parents might only transmit a few of the most important microbes to offspring. However,  
200 if these few symbiotic microbes are important, then parents should be selected to transmit the same symbionts con-  
201 sistently to each offspring; that is, siblings should receive the same or very similar subsets of vertically transmitted  
202 microbes. Contrary to this expectation, we found no evidence that vertically transmitted ASVs were consistent across  
203 offspring from the same parent. For instance, in Figure 3 the taxonomic profiles (at the phylum level) of vertically  
204 transmitted microbes often differ considerably between siblings. We analyzed this quantitatively by calculating Jac-  
205 card (similarity) coefficients between all larvae in our data set (Jaccard coefficients measure the overlap in ASVs  
206 shared between two hosts; a similarity of 1 indicates complete overlap, while a similarity of 0 indicates no overlap).  
207 We found that neither siblings nor non-sibling conspecific larvae shared similar assemblages of vertically transmitted  
208 ASVs (Figure 5). The average Jaccard coefficient for assemblages of vertically transmitted ASVs between siblings  
209 was  $0.023 \pm 0.046$ , which was not different than the Jaccard coefficient between conspecific larvae that did not share the  
210 same parent ( $0.012 \pm 0.029$ ; MD=0.012, 95% CI [-0.010,0.039]; Figure 5). We complemented these analyses by cal-  
211 culating the Jaccard coefficients between each larva for their assemblage of vertically transmitted ASVs that assigned  
212 to *sponge-enriched clusters*. Similarly, we found that neither siblings nor non-sibling conspecifics shared similar as-  
213 semblages of vertically transmitted *sponge-enriched clusters* (Figure S6). The average Jaccard coefficient between  
214 vertically transmitted *sponge-enriched clusters* in siblings was  $0.01 \pm 0.031$ , which was not different than the Jaccard  
215 coefficient between non-sibling conspecific larvae ( $0.001 \pm 0.005$ ; MD=0.014, 95% CI [-0.001,0.039]; Figure S6).

216 The absence of a consistent set of ASVs transmitted between a given parent and its offspring could have at least  
217 two explanations. First, parents may benefit from varying the microbes transmitted to each offspring. Such variability  
218 might be important if offspring disperse long distances and settle in diverse and varying environments. In this case,  
219 larvae containing key symbionts are more likely to survive post settlement. This explanation is analogous to the idea  
220 that a genetically diverse cohort of offspring is more likely to succeed than a genetically uniform offspring (in this case,  
221 the genetic diversity is microbial, not from the host). Importantly, variation in conspecific microbiota may reflect the  
222 nature and strength of host-microbe interactions; when these microbial communities are highly similar (low variation),  
223 this indicates high specificity, where only a specific set of symbionts may be able to interact with the host. In contrast,

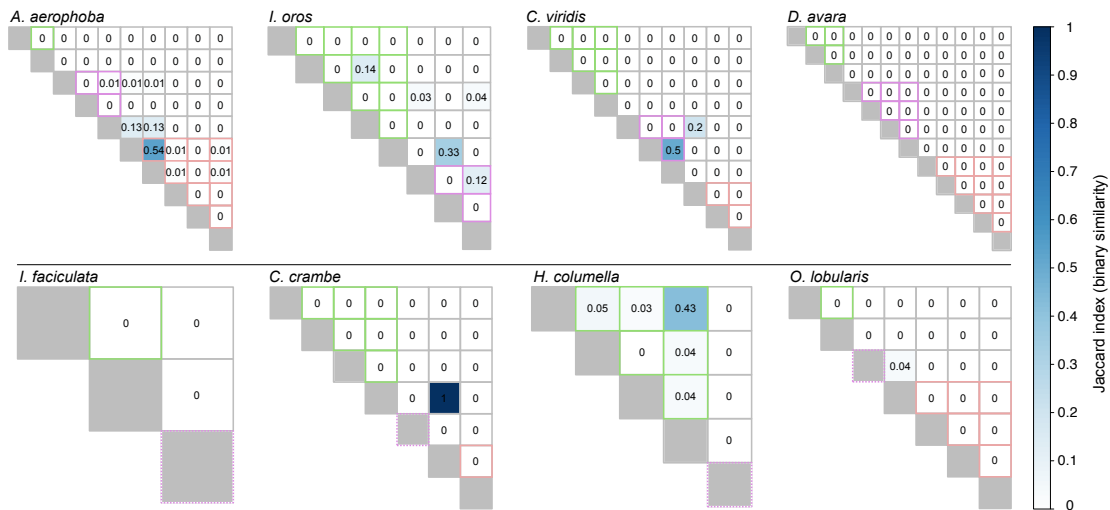

Figure 5: Siblings almost never inherit the same vertically transmitted taxa as show by pairwise Jaccard coefficients calculated for assemblages of vertically transmitted ASVs between larvae that shared the same parent. Each cell represents a larva and sets of siblings from the same parent are indicated by cells bordered by the same color (green, purple, or red). In cases where parents only had one offspring, the diagonal is bordered by a dashed line. Cells with gray borders correspond to Jaccard coefficients calculated for assemblages of vertically transmitted ASVs between conspecific larvae that did not share the same parent. Gray cells represent the comparison with self. The Jaccard index ranges between 0 (no ASVs shared) and 1 (all ASVs shared)

224 when microbiota between conspecific hosts are more variable, this may reflect a situation where specific symbionts  
225 are not required for host functioning [50].

226 Second, an alternative explanation for weak and/or inconsistent vertical transmission is that vertical transmission  
227 is not the primary mechanism by which parents ensure that offspring acquire the symbionts they need. Indeed, adult  
228 and larval sponges lead very different lifestyles, and symbionts that are beneficial to adults are not necessarily the  
229 same as those that are beneficial to larval offspring. Hence, vertical transmission might not be an adaptation in marine  
230 sponges, and the weak signatures of vertical transmission we observed might arise via the same neutral processes that  
231 govern isolation by distance; that is, offspring are more likely to be colonized by a random subset of microbes from  
232 parents as opposed to from non-parental conspecific adults.

### 233 **Vertically transmitted ASVs are not host species-specific**

234 Because vertically transmitted ASVs were inconsistent across offspring from the same parent (Figure 5), but microbes  
235 in adults and larvae were similar at the phylum level (Figure 1), and sometimes showed signs of similarity across larvae  
236 from the same species (Figure 3), we further inquired whether a signal of vertical transmission could be detected at  
237 the host species level; that is, do conspecific adults and larvae share more vertically transmitted ASVs than they do  
238 with individuals from different host species?

239 Contrary to the idea that vertically transmitted microbes demonstrate high levels of host species fidelity as a result  
240 of co-evolution between microbes and host, conspecific adults and larvae did not share more vertically transmitted  
241 ASVs than they did with heterospecific individuals. For instance, pairwise Jaccard coefficients between the aggregated  
242 subsets of vertically transmitted ASVs from all species, revealed that larvae were not more likely to share vertically  
243 transmitted ASVs or *sponge-enriched clusters* with larvae from their own species as compared to larvae of other  
244 species (Figure 6). To test this beyond binary pairwise comparisons, we computed modularity on three weighted  
245 bipartite networks containing all samples. If conspecific adults and larvae harbor the same microbes and do not share  
246 those with other species, then the networks will be organized in compartments consisting of conspecific adults, larvae,  
247 and their shared ASVs. Contrary to our expectation, the *overall* network was the most modular ( $Q^{norm}=0.906$ ) with  
248 the highest NMI score (MNI=0.500) followed by the *sponge-specific* ( $Q^{norm}=0.894$ ; NMI=0.396) and *potentially*  
249 *vertically transmitted* network ( $Q^{norm}=0.865$ ; MNI=0.390; Table S4), indicating that, for at least some ASVs, host  
250 species-specificity decreased with increased host-microbe specialization. In the *overall* network, apart of adults from  
251 the two species *A. aerophoba* and *I. oros* that together formed one module, all other adults, including seawater samples,  
252 formed their own species-specific modules. However, while some modules contained larvae, they rarely corresponded

253 to offspring or even larvae of the same species; instead, a mix of heterospecific larvae tended to form their own  
 254 modules.

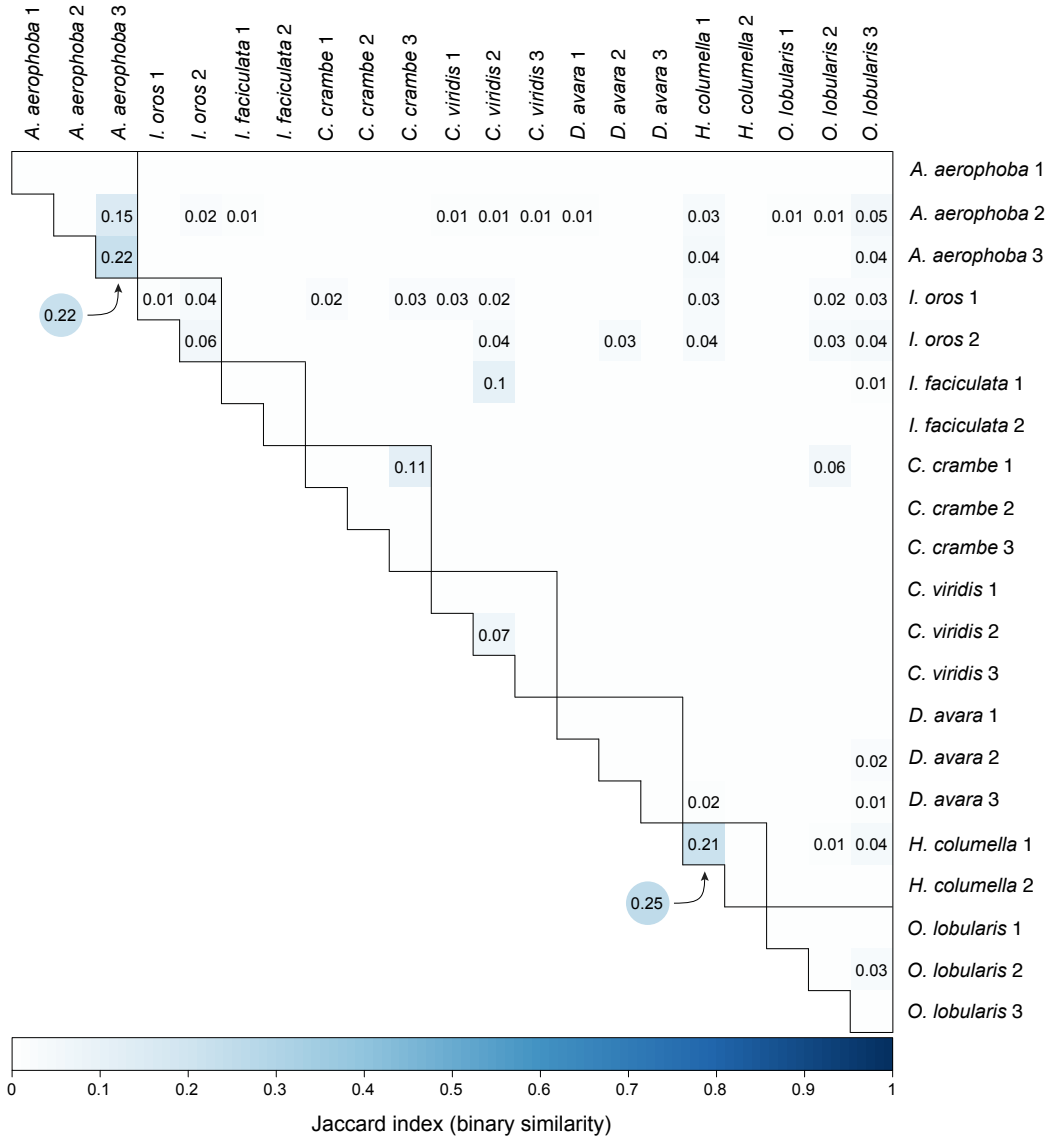

Figure 6: Jaccard coefficients between all the offspring from any two adults calculated for assemblages of vertically transmitted ASVs. The plot shows Jaccard coefficients within and between host species, as well as within single adults (i.e. siblings) on the diagonal. The Jaccard index ranges between 0 (no ASVs shared) and 1 (all ASVs shared). The two circles correspond to the only non-zero Jaccard coefficients for ASVs assigning to *sponge-enriched clusters*.

## Vertically transmitted microbes assign more frequently to *sponge-enriched clusters* than horizontally acquired ones

We hypothesized that vertically transmitted microbes would assign to *sponge-enriched clusters* more frequently than horizontally acquired microbes. Further, we hypothesized that, as host-microbe specialization increases, microbes assigning to these *sponge-enriched clusters* will increase in their contribution to both total ASV richness and total sequence count. To test these hypotheses, we defined horizontally acquired ASVs as those shared between seawater and sponge hosts (blue edges in Figure 2A). We further pooled all the subsets of vertically transmitted ASVs (Figure 2D) into one large assemblage containing vertically transmitted ASVs from all host species. Of the 7,039 different horizontally acquired and 438 different vertically transmitted ASVs, we found that 6.8% and 71% assigned to *sponge-enriched clusters*, and that these assemblages, in turn, accounted for 26.2% and 53.2% of their respective total sequence counts, indicating that *sponge-enriched clusters* indeed are more frequent and abundant among vertically transmitted microbes than among horizontally acquired ones.

The contribution to total ASV richness by microbes assigning to *sponge-enriched clusters* increased for the majority of sponge species as host-microbe specialization increased (Table S5). This pattern is expected as the denominator (number of nodes in the focal network) decreases as we move towards the right in Figure 2. The contribution to the total number of sequences by microbes assigning to these clusters increased for about half of the sponge species (Table S5). This pattern was especially noticeable for *I. fasciculata* and *A. aerophoba*, which harbored some particularly abundant *sponge-enriched clusters* among their vertically transmitted ASVs. Indeed *I. fasciculata* harbored one cluster that accounted for 89% (with n=775 reads) of the total sequence count in the *potentially vertically transmitted* network; *A. aerophoba* harbored a mixture of 122 rare (n=2 reads) and abundant (n=7335 reads) *sponge-enriched clusters*. Furthermore, some host species harbored a higher diversity and relative abundance of these clusters that carried over to the subset of vertically transmitted microbes, suggesting that *sponge-enriched clusters* may play a larger role in some host species than in others (Table S5). For example, *A. aerophoba* harbored over 80% of all identified *sponge-enriched clusters* across the different networks (Table S6). However, from Table S5, it is interesting to note that the number of *sponge-enriched clusters* decreased from the *overall* to the *sponge-specific* network (between 21-51% across host species), further indicating that adult hosts may acquire, at least, some of these clusters horizontally from the seawater.

Of the 105 different *sponge-enriched clusters* identified in the *overall* network, 94 were also detected in the seawater, although at very low abundances (Table S5). In light of our finding that siblings did not inherit the same *sponge-enriched clusters* from their parents, nor were these clusters consistently transmitted across conspecific larvae,

284 this suggests that parents may transmit a random subset of *sponge-enriched clusters* to offspring, and that the signature  
285 of this vertical transmission is only detectable when adults and larvae are pooled across species (Figure 1B). Further-  
286 more, out of the 48 *sponge-enriched clusters* that were identified in the subset of vertically transmitted ASVs, only  
287 four were not present (or below detection limit) in seawater; three clusters belonged to the phylum Chloroflexi, and  
288 one cluster to the phylum Deltaproteobacteria. Interestingly, the latter could be further classified to *Bdellovibrio*—a  
289 genus of gram-negative obligate aerobic bacteria that parasitize and kill other gram-negative bacteria. This genus has  
290 previously been found in the gut microbiome of other animals, including humans, where it is associated with a healthy  
291 gut microbiome [51]. Finally, detailed -omic studies have revealed symbiotic characteristics and functional capabil-  
292 ities of some *sponge-enriched clusters* including, e.g., enrichment of proteins containing eukaryotic-like repeats, the  
293 capacity to degrade complex carbohydrates, and the production of secondary metabolites that are used as defenses by  
294 the sponge host [52, 41, 43]. While these results demonstrate the different but likely vital services *sponge-enriched*  
295 *clusters* provide to marine sponges, we can only speculate in the potential benefits of their unfaithful transmission. As  
296 previously discussed, perhaps unfaithful transmission is beneficial when offspring disperse long distances and settle in  
297 varying environments. Moreover, *sponge-enriched clusters* may be functionally versatile—the exact form of their rela-  
298 tionship with the host may change depending on what other clusters and/or microbes are present in the microbiome,  
299 which is, at least, partly governed by priority effects—the order and timing of species arrivals [53]. Therefore, at the  
300 time of larval settlement, harboring any *sponge-enriched cluster* may strongly influence the succession trajectory and  
301 the functional development of the maturing sponge microbiome.

## 302 Conclusion

303 Vertical transmission is proposed to be a primary mechanism by which parents transmit assemblages of beneficial  
304 microbes to offspring in a way that maintains both these microbes' interactions with each other and the beneficial  
305 functions that emerge from their interactions [14]. However, contrary to these theoretical expectations, evidence is  
306 mounting that this classic view of vertical transmission is rare in animal microbiomes—especially when microbiomes  
307 are highly diverse (see [54] for a review). We find that marine sponges also do not fit the classic mold; while previous  
308 research based on electron micrographs has undeniably detected mechanisms by which parents pass microbes to off-  
309 spring [31, 32], our findings cast doubt on the faithfulness and consistency of these transmissions. Specifically, across  
310 eight sponge species, we show that: (1) vertical transmission is detectable, but weak and incomplete such that offspring  
311 do not receive a replica of their parent's microbiome; (2) parents do not transmit the same suite of microbes to each off-



312 spring; (3) vertically transmitted microbes are not host species-specific and therefore unlikely to have co-evolved with  
313 particular sponge species; and (4) while vertically transmitted microbes assigned more frequently to *sponge-enriched*  
314 *clusters* than horizontally acquired ones, the signature of this vertical transmission is only detectable when adults and  
315 larvae are pooled across species. Furthermore, it is worth noting that measuring vertical transmission at the level of  
316 ASVs is relatively coarse and therefore conservative. A given microbial ASV may contain multiple strains; hence,  
317 while our analysis indicates that vertical transmission makes only a minor contribution to the microbiomes of larval  
318 sponges, our analysis may overestimate the relative contribution of vertical transmission to larval sponge microbiomes.  
319 Strain-level analyses will be required to truly estimate the proportion of microbes shared between sponge parents and  
320 offspring [55].

321 Our findings highlight the need for new theory to explain how hosts ensure the faithful transmission of beneficial  
322 microbiomes. While the classic model may sometimes work well when the microbial symbionts consist of just one or a  
323 few species [6, 18], when microbiomes are very diverse and complex, transferring thousands of microbial species such  
324 that their interaction structures and emergent functions are preserved seems highly improbable. So, how do sponge  
325 parents ensure that offspring get the microbes they need? We know that such mechanisms exist because by the time  
326 sponge juveniles reach adulthood, they have converged on highly similar and species-specific microbiomes [50]. In the  
327 absence of strong vertical transmission, at least two processes may contribute to this convergence. First, evidence from  
328 other ecological communities, including the human gut microbiome, suggests that priority effects strongly influence  
329 community assembly [56, 53, 57, 58]. Even if just a few microbes are vertically transmitted, they may pre-empt the  
330 initial host niche. Those microbes may quickly reach carrying capacity while simultaneously modifying the (host)  
331 niche in their favor, thereby altering the ability of subsequent microbial immigrants to colonize. Hence, vertical  
332 transmission of a few beneficial symbionts may, via priority effects, help build the microbiome anew generation after  
333 generation. Second, sponges likely acquire and curate beneficial microbes by filtering them from the environment. In  
334 our study, we were able to detect 90% (94 of 105) of *sponge enriched clusters* in seawater, and while these were in  
335 low abundances, sponges can filter vast quantities of water: up to 24,000 liters ( $24 m^3$ ) of water per kilogram and day  
336 [59]. Once these microbes are inside the host, the innate immune defenses of some sponge species can differentiate  
337 between pathogens, food bacteria and symbionts in a manner similar to the adaptive immune system of vertebrates  
338 [60, 61, 62, 63, 64, 65]. For some microbes the host niche also provides a more favorable environment than seawater,  
339 in turn, some symbionts have molecular structures that facilitate recognition by the sponge host [41, 52]. Together,  
340 priority effects, horizontal acquisition from the rare biosphere, and active curation and cultivation of microbes by the  
341 sponge host likely combine to create adult sponge microbiota that exhibit low variation between conspecific adults,

342 with sometimes considerable divergence between sponge species living in the same environment [50]. However, we  
343 still do not understand how (or if) evolution has selected hosts to guide these processes, especially priority effects, to  
344 their benefit.

345 Finally, some of our results are relevant to the predictions put forward by of the hologenome theory of evolution  
346 [7, 8, 11]. This theory proposes that there may be value in treating hosts and their microbiota as a single evolutionary  
347 unit. This comes with an important expectation: high partner fidelity—if the collection of genomes varies within and  
348 between host generations, then it is not a coherent unit of selection [9, 10]. Such tight partner fidelity is typically  
349 only found among host-microbe symbioses with obligate vertical transmission. On the contrary, we found that many  
350 vertically transmitted microbes, including many *sponge-enriched clusters*, were not faithfully transmitted by parents to  
351 offspring nor were they host species-specific. As such, their evolution is likely shaped by multiple host species across  
352 the phylum Porifera, as well as by the marine environment where the sponge hosts live. Overall, our study demonstrates  
353 that common predictions of vertical transmission that stem from species-poor systems are not necessarily true when  
354 scaling up to diverse and complex microbiomes.

## 355 **Methods**

356 We collected sponge and seawater samples between July and August 2012, close to the Islas Medas marine reserve  
357 in the northwestern Mediterranean Sea 42°3'0"N, 3°13'0"E by SCUBA at depths between 5-15 m. The analyzed  
358 species are common Mediterranean sponges and were identified based on their distinct morphological features.

### 359 **Larval sponge collection**

360 We constructed larvae traps by modifying the traps used in [66] (Figure S7). In order to collect offspring from known  
361 parents, traps were mounted over individual adult sponges by SCUBA. To minimize stress to individual adults, traps  
362 were removed after one week. During this time, sample bottles were collected and replaced every day. Bottles  
363 were placed on ice in insulated coolers and transported to the laboratory (<2 hours). Larvae were identified using a  
364 stereolupe. In order to remove loosely associated microbes, larvae were carefully rinsed with filter-sterilized seawater  
365 (0.20 µm filter) before preservation in RNA later. All larval samples were stored at -80°C until DNA extraction.

## 366 **Adult sponge collection**

367 After larvae offspring were collected, three adults per sponge species were sampled. These individuals corresponded  
368 to the same adults that larvae had been collected for. However, for a few species, larvae could only be collected for  
369 two adults. In these cases, a third adult was still sampled. Specimens were sub-lethally sampled by removing a small  
370 sample of tissue. Excised tissue was placed in separate plastic tubes and brought to the surface where they were  
371 preserved in RNA later and placed on ice in insulated coolers and transported to the laboratory (<2 hours). Seawater  
372 samples were collected at 5 m depth and at 7 locations within the sampling area. All seven water samples were poured  
373 into separate, sterile 5 L jars. Aliquots of seawater (300-500 mL each, 1 aliquot per sample jar) were concentrated on  
374 0.2  $\mu\text{m}$  polycarbonate filters, and submerged in lysis buffer. All samples were stored at  $-80^{\circ}\text{C}$  until DNA extraction.

## 375 **DNA extraction and sequencing**

376 DNA was extracted from  $\approx 0.25$  g of adult sponge tissue using the PowerSoil DNA extraction kit (MoBio). DNA from  
377 larvae (one larva per adult) was extracted using the XS-RNA extraction kit (Macherey-Nagel) because of its capacity to  
378 extract DNA from small samples, i.e., one larva. All DNA extractions were performed according to standard protocols.  
379 The 7 seawater samples were processed by passing 2 L (from the 5 L) of seawater through 0.2  $\mu\text{m}$  Sterivex filters, and  
380 DNA was extracted from these filters as described by [39]. The V4 region of the 16S rRNA gene was amplified using  
381 the primer 515FB-806RB [67] and sequenced using the Illumina HiSeq2500 platform. Sequencing was performed by  
382 the Earth Microbiome Project [68].

## 383 **Identification of *sponge-specific clusters***

384 A representative sequence from each ASV was taxonomically assigned using a BLAST 62 search against a curated  
385 ARB-SILVA database containing 178 previously identified *sponge-specific clusters* [28]. For each BLAST search,  
386 the 10 best hits were aligned to determine sequence similarities. The most similar ASV sequence to the respective  
387 reference sequence within the database was then assigned to an *sponge-specific clusters* based on a 75% similarity  
388 threshold: (i) a sequence was only assigned to any given *sponge-specific clusters* if its similarity was higher to the  
389 members of the cluster than to sequences outside the cluster; and (ii) if its similarity to the most similar sequence  
390 within the cluster was above 75%. A majority rule was applied in cases where the assignment of the most similar  
391 sequences was inconsistent, and the ASV sequence was only assigned to the *sponge-specific clusters* if at least 60%  
392 of the reference sequences were affiliated with the cluster.

## 393 **Analyses**

394 Illumina-sequenced, paired-end fastq files were processed and cleaned using default settings in DADA2 [69] to pro-  
395 duce an amplicon sequence variant (ASV) table. To partition data into the different bipartite networks and to find ver-  
396 tically transmitted microbes, we used simple set theory. Modularity was analyzed using the `DIRT_LPA_wb_plus`  
397 [46]. We computed modularity on both weighted and unweighted bipartite networks; the main difference between the  
398 two is that when calculating modularity on an unweighted network, it does not allow for any weighting by information  
399 content (here relative abundance), i.e., rare microbes are as important as abundant ones. While we found the results  
400 to be quantitatively different (as others also have demonstrated, [47, 46]), they lead to the same overall conclusion.  
401 We further used Normalized Mutual Information (NMI) criterion [48, 49] to test whether observed modules deviated  
402 from prior expectations. These algorithms were run in R. In the few cases where statistical analyses were performed,  
403 we used estimation statistics; a simple framework that avoids the pitfalls of significance testing that calculates a dis-  
404 tribution of mean differences that is an approximation of the Bayesian posterior probability distribution [70]. This  
405 distribution is used to weigh plausibility over an effect likelihood size range, and is visualized in a Gardner-Altman  
406 comparison plot [71]. We used the 95% highest density interval (HDI) as a measure of statistical significance. That  
407 is, if a parameter or a pairwise parameter comparison excludes zero, then we conclude that the probability of the  
408 difference being significantly different from zero exceeds 95%. This was done in the `DABEST Python` package in  
409 R via the `reticulate` package. Lastly, we used the logit transformation as a variance-stabilizing transformation  
410 of proportions. The logit transformation is the log of the odds ratio; that is, the log of the proportion divided by one  
411 minus the proportion. In practice, the transformation expands the ends of the scale, such that small differences in the  
412 proportions have a larger difference on the logit scale.

## 413 **Acknowledgements**

414 We thank Dr. Rafel Coma and Dr. Eduard Serrano for help in the field, and Dr. Cristina Diez-Vives for help extracting  
415 DNA. J.R.B. was supported by an FPI Fellowship from the Spanish Government (BES-2011-049043). J.M.M. was  
416 supported by the French LabEx TULIP (ANR-10-LABX-41; ANR-11-IDEX-002-02), by the Region Midi-Pyrenees  
417 project (CNRS 121090) and by the FRAGCLIM Consolidator Grant, funded by the European Research Council under  
418 the European Union's Horizon 2020 research and innovation programme (grant agreement number 726176).

## 419 Authors' contributions

420 J.R.B. and J.M.M. conceived the study. J.R.B. performed the fieldwork and analyzed the data. J.R.B. and J.M.M.  
421 drafted the first versions of the manuscript, and J.R.B. and E.A. refined the ideas and wrote the final version of the  
422 paper. C.A.G. identified the *sponge-specific clusters*. All authors commented and approved of later versions of the  
423 paper.

## 424 Data and code availability

425 All data and code will be available on Open Science Framework with an R Markdown document such that all  
426 analyses and figures can be reproduced.

## 427 References

- 428 [1] Hauke Koch and Paul Schmid-Hempel. “Socially transmitted gut microbiota protect bumble bees against an  
429 intestinal parasite”. In: *Proceedings of the National Academy of Sciences* 108.48 (2011), pp. 19288–19292.  
430 DOI: [10.1073/pnas.1110474108](https://doi.org/10.1073/pnas.1110474108).
- 431 [2] Patrick Smith et al. “Regulation of life span by the gut microbiota in the short-lived African turquoise killifish”.  
432 In: *eLife* 6 (2017), e27014. DOI: [10.7554/eLife.27014](https://doi.org/10.7554/eLife.27014).
- 433 [3] Amanda L. Kwong Waldan K. and Mancenido and Nancy A. Moran. “Immune system stimulation by the native  
434 gut microbiota of honey bees”. In: *R Soc Open Sci* 4.2 (2017), p. 170003. DOI: [10.1098/rsos.170003](https://doi.org/10.1098/rsos.170003).
- 435 [4] Lisa J. Funkhouser and Seth R. Bordenstein. “Mom Knows Best: The Universality of Maternal Microbial Trans-  
436 mission”. In: *PLoS Biology* 11.8 (2013), pp. 1–9. DOI: [10.1371/journal.pbio.1001631](https://doi.org/10.1371/journal.pbio.1001631).
- 437 [5] Roberta M. Fisher et al. “The evolution of host-symbiont dependence”. In: *Nature Communications* 8 (2017),  
438 15973 EP. DOI: [10.1038/ncomms15973](https://doi.org/10.1038/ncomms15973).
- 439 [6] Aaron C. Hartmann et al. “The Paradox of Environmental Symbiont Acquisition in Obligate Mutualisms”. In:  
440 *Current Biology* 27.23 (2017), 3711–3716.e3. DOI: [10.1016/j.cub.2017.10.036](https://doi.org/10.1016/j.cub.2017.10.036).
- 441 [7] Ilana Zilber-Rosenberg and Eugene Rosenberg. “Role of microorganisms in the evolution of animals and plants:  
442 the hologenome theory of evolution”. In: *FEMS Microbiology Reviews* 32.5 (2008), pp. 723–735. DOI: [10.  
443 1111/j.1574-6976.2008.00123.x](https://doi.org/10.1111/j.1574-6976.2008.00123.x).

- 444 [8] Seth R. Bordenstein and Kevin R. Theis. “Host Biology in Light of the Microbiome: Ten Principles of Holo-  
445 bionts and Hologenomes”. In: *PLOS Biology* 13.8 (2015), e1002226. DOI: [10.1371/journal.pbio.  
446 1002226](https://doi.org/10.1371/journal.pbio.1002226).
- 447 [9] Nancy A. Moran and Daniel B. Sloan. “The Hologenome Concept: Helpful or Hollow?” In: *PLOS Biology*  
448 13.12 (Dec. 2015), pp. 1–10. DOI: [10.1371/journal.pbio.1002311](https://doi.org/10.1371/journal.pbio.1002311).
- 449 [10] Angela E. Douglas and John H. Werren. “Holes in the Hologenome: Why Host-Microbe Symbioses Are Not  
450 Holobionts”. In: *mBio* 7.2 (2016). DOI: [10.1128/mBio.02099-15](https://doi.org/10.1128/mBio.02099-15).
- 451 [11] Eugene Rosenberg and Ilana Zilber-Rosenberg. “The hologenome concept of evolution after 10 years”. In:  
452 *Microbiome* 6.1 (2018), p. 78. DOI: [10.1186/s40168-018-0457-9](https://doi.org/10.1186/s40168-018-0457-9).
- 453 [12] Paul W. Ewald. “Transmission Modes and Evolution of the Parasitism-Mutualism Continuum”. In: *Annals of*  
454 *the New York Academy of Sciences* 503.1 (1987), pp. 295–306. DOI: [10.1111/j.1749-6632.1987.  
455 tb40616.x](https://doi.org/10.1111/j.1749-6632.1987.tb40616.x).
- 456 [13] J. J. Bull, Ian J. Molineux, and W. R. Rice. “Selection of Benevolence in a Host-Parasite System”. In: *Evolution*  
457 45.4 (1991), pp. 875–882. DOI: [10.2307/2409695](https://doi.org/10.2307/2409695).
- 458 [14] John N Thompson. *The coevolutionary process*. University of Chicago Press, 1994. ISBN: 978-0226797601.
- 459 [15] Edward G Ruby. “Symbiotic conversations are revealed under genetic interrogation.” In: *Nature Reviews Mi-*  
460 *crobiology* 6.10 (2008), pp. 752–762. DOI: [10.1038/nrmicro1958](https://doi.org/10.1038/nrmicro1958).
- 461 [16] Jennifer M. Bates et al. “Distinct signals from the microbiota promote different aspects of zebrafish gut differen-  
462 tiation”. In: *Developmental Biology* 297.2 (2006), pp. 374–386. DOI: [10.1016/j.ydbio.2006.05.006](https://doi.org/10.1016/j.ydbio.2006.05.006).
- 463 [17] Yoshitomo Kikuchi, Takahiro Hosokawa, and Takema Fukatsu. “Insect-Microbe Mutualism without Vertical  
464 Transmission: a Stinkbug Acquires a Beneficial Gut Symbiont from the Environment Every Generation”. In:  
465 *Applied and Environmental Microbiology* 73.13 (2007), p. 4308. DOI: [10.1128/AEM.00067-07](https://doi.org/10.1128/AEM.00067-07).
- 466 [18] Phuong-Thao Ho et al. “Geographical structure of endosymbiotic bacteria hosted by *Bathymodiolus* mussels  
467 at eastern Pacific hydrothermal vents”. In: *BMC Evolutionary Biology* 17.1 (2017), p. 121. DOI: [10.1186/  
468 s12862-017-0966-3](https://doi.org/10.1186/s12862-017-0966-3).
- 469 [19] Spencer V. Nyholm et al. “Establishment of an animal-bacterial association: Recruiting symbiotic vibrios from  
470 the environment”. In: *Proceedings of the National Academy of Sciences* 97.18 (2000), p. 10231. DOI: [10.  
471 1073/pnas.97.18.10231](https://doi.org/10.1073/pnas.97.18.10231).

- 472 [20] Nicole Dubilier et al. “Endosymbiotic sulphate-reducing and sulphide-oxidizing bacteria in an oligochaete  
473 worm”. In: *Nature* 411 (2001), 298 EP. DOI: [10.1038/35077067](https://doi.org/10.1038/35077067).
- 474 [21] Alexandra A. Mushegian et al. “The microbiota of diapause: How host-microbe associations are formed after  
475 dormancy in an aquatic crustacean”. In: *Journal of Animal Ecology* 87.2 (2017), pp. 400–413. DOI: [10.1111/  
476 1365-2656.12709](https://doi.org/10.1111/1365-2656.12709).
- 477 [22] Zongjun Yin et al. “Sponge grade body fossil with cellular resolution dating 60 Myr before the Cambrian.” In:  
478 *Proceedings of the National Academy of Sciences of the United States of America* 112.12 (2015), E1453–60.
- 479 [23] Micheal W Taylor et al. “Sponge-associated microorganisms: evolution, evology, and biotechnological poten-  
480 tial”. In: *Microbiology and Molecular Biology Reviews* 71.2 (2007), pp. 295–347. DOI: [10.1128/MMBR.  
481 00040-06](https://doi.org/10.1128/MMBR.00040-06).
- 482 [24] L. Fan et al. “Functional equivalence and evolutionary convergence in complex communities of microbial  
483 sponge symbionts”. In: *Proceedings of the National Academy of Sciences* 109.27 (2012), E1878–E1887. DOI:  
484 [10.1073/pnas.1203287109](https://doi.org/10.1073/pnas.1203287109).
- 485 [25] Jasper M. De Goeij et al. “Surviving in a Marine Desert: The Sponge Loop Retains Resources Within Coral  
486 Reefs”. In: *Science* 342.October (2013), pp. 108–110. DOI: [10.1126/science.1241981](https://doi.org/10.1126/science.1241981).
- 487 [26] Susanne Schmitt et al. “Molecular microbial diversity survey of sponge reproductive stages and mechanistic  
488 insights into vertical transmission of microbial symbionts”. In: *Applied and Environmental Microbiology* 74.24  
489 (2008), pp. 7694–7708.
- 490 [27] Ute Hentschel et al. “Molecular Evidence for a Uniform Microbial Community in Sponges from Different  
491 Oceans Molecular Evidence for a Uniform Microbial Community in Sponges from Different Oceans”. In: *Ap-  
492 plied and Environmental Microbiology* 68.9 (2002), pp. 4431–4440. DOI: [10.1128/AEM.68.9.4431-  
493 4440.2002](https://doi.org/10.1128/AEM.68.9.4431-4440.2002).
- 494 [28] Rachel L. Simister et al. “Sponge-specific clusters revisited: A comprehensive phylogeny of sponge-associated  
495 microorganisms”. In: *Environmental Microbiology* 14.2 (2012), pp. 517–524. DOI: [10.1111/j.1462-  
496 2920.2011.02664.x](https://doi.org/10.1111/j.1462-2920.2011.02664.x).
- 497 [29] Jean Vacelet and Claude Donadey. “Electron microscope study of the association between some sponges and  
498 bacteria”. In: *Journal of Experimental Marine Biology and Ecology* 30.3 (1977), pp. 301–314. DOI: [10.1016/  
499 0022-0981\(77\)90038-7](https://doi.org/10.1016/0022-0981(77)90038-7).

- 500 [30] A.V. Ereskovsky and D.B. Tokina. “Morphology and fine structure of the swimming larvae of *Ircinia oros*  
501 (Porifera, Demospongiae, Dictyoceratida)”. In: *Invertebrate Reproduction & Development* 45.2 (2004), pp. 137–  
502 150. DOI: [10.1080/07924259.2004.9652583](https://doi.org/10.1080/07924259.2004.9652583)
- 503 [31] Alexander V. Ereskovsky, Elizaveta Gonoboleva, and Andrey Vishnyakov. “Morphological evidence for ver-  
504 tical transmission of symbiotic bacteria in the viviparous sponge *Halisarca dujardini* Johnston (Porifera, De-  
505 mospongiae, Halisarcida)”. In: *Marine Biology* 146.5 (2005), pp. 869–875. DOI: [https://doi.org/10.  
506 1007/s00227-004-1489-1](https://doi.org/10.1007/s00227-004-1489-1)
- 507 [32] Manuel Maldonado. “Intergenerational transmission of symbiotic bacteria in oviparous and viviparous demo-  
508 sponges, with emphasis on intracytoplasmically-compartmented bacterial types”. In: *Journal of the Marine  
509 Biological Association of the UK* 87.06 (2007), pp. 1701–1713. DOI: [10.1017/S0025315407058080](https://doi.org/10.1017/S0025315407058080)
- 510 [33] María J. Uriz, Turon Xavier, and Becerro Mikel A. “Morphology and Ultrastructure of the Swimming Larvae of  
511 *Crambe crambe* (Demospongiae, Poecilosclerida)”. In: *Invertebrate Biology* 120.4 (2001), pp. 295–307. DOI:  
512 [10.1111/j.1744-7410.2001.tb00039.x](https://doi.org/10.1111/j.1744-7410.2001.tb00039.x)
- 513 [34] Ana Riesgo and Manuel Maldonado. “Differences in reproductive timing among sponges sharing habitat and  
514 thermal regime”. In: *Invertebrate Biology* 127.4 (2008), pp. 357–367. DOI: [10.1111/j.1744-7410.  
515 2008.00128.x](https://doi.org/10.1111/j.1744-7410.2008.00128.x)
- 516 [35] Manuel Maldonado and Ana Riesgo. “Gametogenesis, embryogenesis, and larval features of the oviparous  
517 sponge *Petrosia ficiformis* (Haplosclerida, Demospongiae)”. In: *Marine Biology* 156.10 (2009), pp. 2181–2197.  
518 DOI: [10.1007/s00227-009-1248-4](https://doi.org/10.1007/s00227-009-1248-4)
- 519 [36] Julie J. Enticknap et al. “Characterization of a culturable alphaproteobacterial symbiont common to many ma-  
520 rine sponges and evidence for vertical transmission via sponge larvae”. In: *Applied and Environmental Micro-  
521 biology* 72.5 (2006), pp. 3724–3732. DOI: [10.1128/AEM.72.5.3724-3732.2006](https://doi.org/10.1128/AEM.72.5.3724-3732.2006)
- 522 [37] Susanne Schmitt et al. “Vertical transmission of a phylogenetically complex microbial consortium in the viviparous  
523 sponge *Ircinia felix*”. In: *Applied and Environmental Microbiology* 73.7 (2007), pp. 2067–2078. DOI: [10.  
524 1128/AEM.01944-06](https://doi.org/10.1128/AEM.01944-06)
- 525 [38] On On Lee et al. “Evidence for vertical transmission of bacterial symbionts from adult to embryo in the  
526 Caribbean Sponge *Svenzea zeai*”. In: *Applied and Environmental Microbiology* 75.19 (2009), pp. 6147–6156.  
527 DOI: [10.1128/AEM.00023-09](https://doi.org/10.1128/AEM.00023-09)



- 528 [39] Nicole S. Webster et al. “Deep sequencing reveals exceptional diversity and modes of transmission for bacterial  
529 sponge symbionts”. In: *Environmental Microbiology* 12.8 (2010), pp. 2070–2082. DOI: [10.1111/j.1462-  
530 2920.2009.02065.x](https://doi.org/10.1111/j.1462-2920.2009.02065.x)
- 531 [40] Koty H. Sharp et al. “Vertical transmission of diverse microbes in the tropical sponge *Corticium* sp.” In: *Applied  
532 and Environmental Microbiology* 73.2 (2007), pp. 622–629. DOI: [10.1128/AEM.01493-06](https://doi.org/10.1128/AEM.01493-06)
- 533 [41] Janine Kamke et al. “The candidate phylum Poribacteria by single-cell genomics: New insights into phylogeny,  
534 cell-compartmentation, eukaryote-like repeat proteins, and other genomic features”. In: *PLoS ONE* 9.1 (2014).  
535 DOI: [10.1371/journal.pone.0087353](https://doi.org/10.1371/journal.pone.0087353)
- 536 [42] Kristina Bayer et al. “Marine sponges as Chloroflexi hot-spots: Genomic insights and high resolution visualiza-  
537 tion of an abundant and diverse symbiotic clade”. In: *bioRxiv* (2018). DOI: [10.1101/328013](https://doi.org/10.1101/328013)
- 538 [43] Astudillo-García Carmen et al. “Phylogeny and genomics of SAUL, an enigmatic bacterial lineage frequently  
539 associated with marine sponges, journal=Environmental Microbiology, year=2017, volume=20, number=2,  
540 pages=561-576, doi=10.1111/1462-2920.13965”. In: ().
- 541 [44] Carlos Pedrós-Alió. “Dipping into the Rare Biosphere”. In: *Science* 315.5809 (2007), p. 192. DOI: [10.1126/  
542 science.1135933](https://doi.org/10.1126/science.1135933)
- 543 [45] T.L. Simpson. *The Cell Biology of Sponges*. Springer New York, 1984. ISBN: 9781461252146.
- 544 [46] Stephen J Beckett. “Improved community detection in weighted bipartite networks”. In: *R Soc Open Sci.* 3.1  
545 (2016), p. 140536. DOI: [10.1098/rsos.140536](https://doi.org/10.1098/rsos.140536)
- 546 [47] Carsten F. Dormann and Rouven Strauss. “A method for detecting modules in quantitative bipartite networks”.  
547 In: *Methods in Ecology and Evolution* 5.1 (2013), pp. 90–98. DOI: [10.1111/2041-210X.12139](https://doi.org/10.1111/2041-210X.12139)
- 548 [48] Leon Danon Arenas et al. “Comparing community structure identification”. In: *Journal of Statistical Mechan-  
549 ics: Theory and Experiment* 2005.09 (2005), P09008. DOI: [10.1088/1742-5468/2005/09/P09008](https://doi.org/10.1088/1742-5468/2005/09/P09008)
- 550 [49] Elisa Thébault. “Identifying compartments in presence-absence matrices and bipartite networks: insights into  
551 modularity measures”. In: *Journal of Biogeography* 40.4 (2012), pp. 759–768. DOI: [10.1111/j.bi.12015](https://doi.org/10.1111/j.bi.12015)
- 552 [50] Torsten Thomas et al. “Diversity, structure and convergent evolution of the global sponge microbiome”. In:  
553 *Nature Communications* 7 (2016). DOI: [10.1038/ncomms11870](https://doi.org/10.1038/ncomms11870)
- 554 [51] Valerio Iebba et al. “Higher Prevalence and Abundance of *Bdellovibrio bacteriovorus* in the Human Gut of  
555 Healthy Subjects”. In: *PLOS ONE* 8.4 (2013), e61608. DOI: [10.1371/journal.pone.0061608](https://doi.org/10.1371/journal.pone.0061608)

- 556 [52] Janine Kamke et al. “Single-cell genomics reveals complex carbohydrate degradation patterns in poribacterial  
557 symbionts of marine sponges”. In: *ISME J* 7.12 (2013), pp. 2287–2300. DOI: [10.1038/ismej.2013.111](https://doi.org/10.1038/ismej.2013.111)
- 558 [53] Tadashi Fukami. “Historical contingency in community assembly : integrating niches, species pools, and pri-  
559 ority effects”. In: *Annual Review of Ecology Evolution and Systematics* 46.July (2015), pp. 1–23. DOI: [10.1146/annurev-ecolsys-110411-160340](https://doi.org/10.1146/annurev-ecolsys-110411-160340),
- 560
- 561 [54] Monika Bright and Silvia Bulgheresi. “A complex journey: transmission of microbial symbionts”. In: *Nat Rev*  
562 *Microbiol* 8.3 (2010), pp. 218–230. DOI: [10.1038/nrmicro2262](https://doi.org/10.1038/nrmicro2262).
- 563 [55] Francesco Asnicar et al. “Studying Vertical Microbiome Transmission from Mothers to Infants by Strain-Level  
564 Metagenomic Profiling”. In: *mSystems* 2.1 (2017). DOI: [10.1128/mSystems.00164-16](https://doi.org/10.1128/mSystems.00164-16),
- 565 [56] Jonathan M Chase. “Stochastic community assembly causes higher biodiversity in more productive environ-  
566 ments.” In: *Science (New York, N.Y.)* 328.5984 (2010), pp. 1388–91. URL: [http://www.ncbi.nlm.nih.](http://www.ncbi.nlm.nih.gov/pubmed/20508088)  
567 [gov/pubmed/20508088](http://www.ncbi.nlm.nih.gov/pubmed/20508088).
- 568 [57] Inés Martínez et al. “Experimental evaluation of the importance of colonization history in early-life gut micro-  
569 biota assembly”. In: *eLife* 7 (2018), e36521. DOI: [10.7554/eLife.36521](https://doi.org/10.7554/eLife.36521)
- 570 [58] Daniel Sprockett, Tadashi Fukami, and David A. Relman. “Role of priority effects in the early-life assembly of  
571 the gut microbiota”. In: *Nature Reviews Gastroenterology and Hepatology* (2018), pp. 1–9. DOI: [10.1038/](https://doi.org/10.1038/nrgastro.2017.173)  
572 [nrgastro.2017.173](https://doi.org/10.1038/nrgastro.2017.173).
- 573 [59] S. Vogel. “Current-induced flow through living sponges in nature.” In: *Proc. Natl. Acad. Sci. USA* 74.5 (1977),  
574 pp. 2069–2071. ISSN: 0027-8424.
- 575 [60] C R Wilkinson, R Garrone, and J Vacelet. “Marine Sponges Discriminate between Food Bacteria and Bacterial  
576 Symbionts: Electron Microscope Radioautography and in situ Evidence”. In: *Proceedings of the Royal Society*  
577 *of London. Series B. Biological Sciences* 220.1221 (1984), pp. 519–528. DOI: [10.1098/rspb.1984.0018](https://doi.org/10.1098/rspb.1984.0018)
- 578 [61] Markus Wehrl, Michael Steinert, and Ute Hentschel. “Bacterial uptake by the marine sponge *Aplysina aereo-*  
579 *phoba*”. In: *Microbial Ecology* 53.2 (2007), pp. 355–365. DOI: [10.1007/s00248-006-9090-4](https://doi.org/10.1007/s00248-006-9090-4),
- 580 [62] Matthias Wiens et al. “Toll-like receptors are part of the innate immune defense system of sponges (*Demospon-*  
581 *giae: Porifera*)”. In: *Molecular Biology and Evolution* 24.3 (2007), pp. 792–804. DOI: [10.1093/molbev/](https://doi.org/10.1093/molbev/msl208)  
582 [msl208](https://doi.org/10.1093/molbev/msl208).

- 583 [63] Torsten Thomas et al. “Functional genomic signatures of sponge bacteria reveal unique and shared features of  
584 symbiosis.” In: *The ISME journal* 4.12 (2010), pp. 1557–1567. DOI: [10.1038/ismej.2010.74](https://doi.org/10.1038/ismej.2010.74).
- 585 [64] Benedict Yuen, Joanne M. Bayes, and Sandie M. Degnan. “The characterization of sponge nlr provides in-  
586 sight into the origin and evolution of this innate immune gene family in animals”. In: *Molecular Biology and*  
587 *Evolution* 31.1 (2014), pp. 106–120. DOI: [10.1093/molbev/mst174](https://doi.org/10.1093/molbev/mst174).
- 588 [65] Sandie M. Degnan. “The surprisingly complex immune gene repertoire of a simple sponge, exemplified by  
589 the NLR genes: A capacity for specificity?” In: *Developmental and Comparative Immunology* 48.2 (2015),  
590 pp. 269–274. DOI: [10.1016/j.dci.2014.07.012](https://doi.org/10.1016/j.dci.2014.07.012).
- 591 [66] N. Lindquist. “Palatability of invertebrate larvae to corals and sea anemones”. In: *Marine Biology* 126.4 (1996),  
592 pp. 745–755. DOI: [10.1007/BF00351341](https://doi.org/10.1007/BF00351341).
- 593 [67] J Gregory Caporaso et al. “Ultra-high-throughput microbial community analysis on the Illumina HiSeq and  
594 MiSeq platforms”. In: *The ISME Journal* 6.8 (2012), pp. 1621–1624. DOI: [10.1038/ismej.2012.8](https://doi.org/10.1038/ismej.2012.8).
- 595 [68] Jack A Gilbert, Janet K Jansson, and Rob Knight. “The Earth Microbiome project: successes and aspirations”.  
596 In: *BMC Biology* 12.1 (2014), p. 69. URL: <http://www.biomedcentral.com/1741-7007/12/69>.
- 597 [69] Benjamin J. Callahan et al. “DADA2: High resolution sample inference from Illumina amplicon data”. In: *Nat*  
598 *Methods* 13.7 (2016), pp. 581–583. DOI: [10.1038/nmeth.3869](https://doi.org/10.1038/nmeth.3869).
- 599 [70] Adam Claridge-Chang and Pryseley N. Assam. “Estimation statistics should replace significance testing”. In:  
600 *Nature Methods* 13 (2016), 108 EP–. URL: <http://dx.doi.org/10.1038/nmeth.3729>.
- 601 [71] Joes Ho et al. “Moving beyond P values: Everyday data analysis with estimation plots”. In: *bioRxiv* (2018).  
602 DOI: [10.1101/377978](https://doi.org/10.1101/377978), eprint: [https://www.biorxiv.org/content/early/2018/07/](https://www.biorxiv.org/content/early/2018/07/26/377978.full.pdf)  
603 [26/377978.full.pdf](https://www.biorxiv.org/content/early/2018/07/26/377978.full.pdf), URL: [https://www.biorxiv.org/content/early/2018/07/26/](https://www.biorxiv.org/content/early/2018/07/26/377978)  
604 [377978](https://www.biorxiv.org/content/early/2018/07/26/377978).
